# Supplementary material for: Transcriptome-Wide Identification and Expression Analysis of Genes Encoding Defense-Related Peptides of Filipendula ulmaria in Response to Bipolaris sorokiniana Infection
Source: MDPI journal article supplement (doi:10.3390/jof10040258), 2024-03-28
Supplement: s1 [file s1]

**Table S1.** List of primers for qRT-PCR validation.

| Nº  | Gene             | Pr_dir 5' → 3'        | Pr_rev 5' → 3'         | Length (bp) | T primer annealing (°C) |
|-----|------------------|-----------------------|------------------------|-------------|-------------------------|
| 1.  | <i>FuLTP2</i>    | CAAATGCCGCAGTTTCTGGT  | ACACCCAGCTTGCACAGTAT   | 220         | 60                      |
| 2.  | <i>FuLTP3</i>    | TGCCCTAGGGATAACCCTGAA | CTTTGATGGCGGTGCAAAGA   | 157         | 59                      |
| 3.  | <i>FuMEG1</i>    | TGAGCAGGTAGAGCCACCA   | ATGAGTTAGGGACATCCAAAGC | 252         | 59                      |
| 4.  | <i>FuOlee1.4</i> | GACTCTTGCCGCTTCGGATA  | GGTCACGTCCCTGAACAAC    | 238         | 60                      |
| 5.  | <i>FuSN1</i>     | CAAGACTGGAGGTCATCACA  | TTGCCATAGAAGCCAGGAGG   | 180         | 60                      |
| 6.  | <i>FuRALF1</i>   | CATGAAGTTAGTGGCCGGGA  | CGAGAGCGCACCGTATGAAA   | 175         | 60                      |
| 7.  | <i>FuRALF2</i>   | GAGTTCTCTCGGTGTGGCAG  | GATTGGTAGGGGCCTTGACG   | 244         | 59                      |
| 8.  | <i>FuCRP2</i>    | GGTGCAGTGTGGCTTCCATA  | TCAGCAGTCGGAAAAAGGCA   | 215         | 59                      |
| 9.  | <i>FuCRP5</i>    | CCATCTGGTGACGGGCTAAG  | CGGCGAGGAGGAAAACTTGA   | 145         | 60                      |
| 10. | <i>FuDEFL1-3</i> | GCCCTCTTCATTCTCTTGGCT | AGCCTTCATTGCGACAGACC   | 136         | 60                      |
| 11. | <i>FuEF1-α</i>   | TCATCATGAACCACCCTGGC  | ACTTGGGCTCCTTCTCAAGC   | 144         | 59–60                   |
